# Supplementary material for: Photonic sintering of a ZnO nanosheet photoanode using flash white light combined with deep UV irradiation for dye-sensitized solar cells
Source: Royal Society of Chemistry journal article supplement (doi:10.1039/c6ra26815c), 2017-01-01
Supplement: c6ra26815c1.pdf [file c6ra26815c1.pdf]

## Supporting Information

### **Photonic Sintering of ZnO Nanosheet Photoanode using Flash White Light combined with Deep-UV Irradiation for Dye-Sensitized Solar Cells**

Supriya A. Patil<sup>a,b</sup>, Hyun-Jun Hwang<sup>a</sup>, Myeoung-Hyun Yu<sup>a</sup>, Nabeen K. Shrestha<sup>c</sup>, Hak-Sung Kim<sup>a,b\*</sup>

<sup>a</sup>Department of Mechanical Engineering, Hanyang University, Haengdang-dong, Seongdong-gu, Seoul 133-791, South Korea.

<sup>b</sup>Institute of Nano Science and Technology, Hanyang University, Seoul, 133-79, Korea.

<sup>c</sup>Institute of Materials Design, Department of Chemistry, Hanyang University, Seongdong-gu, 133-791 Seoul, Republic of Korea.

\*Corresponding author

**E-mail-** [kima@hanyang.ac.kr](mailto:kima@hanyang.ac.kr), [kima1774@gmail.com](mailto:kima1774@gmail.com)

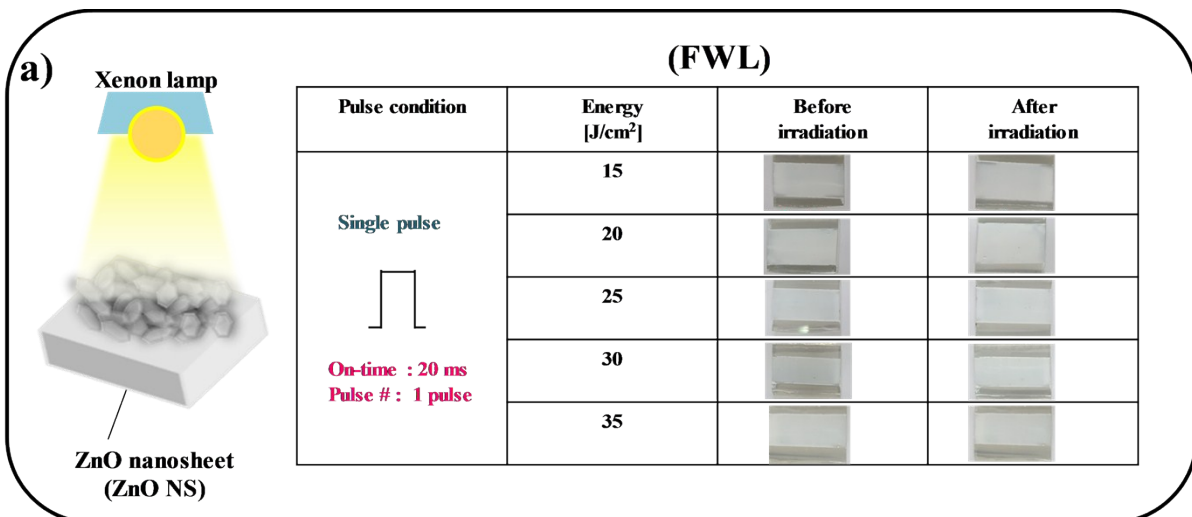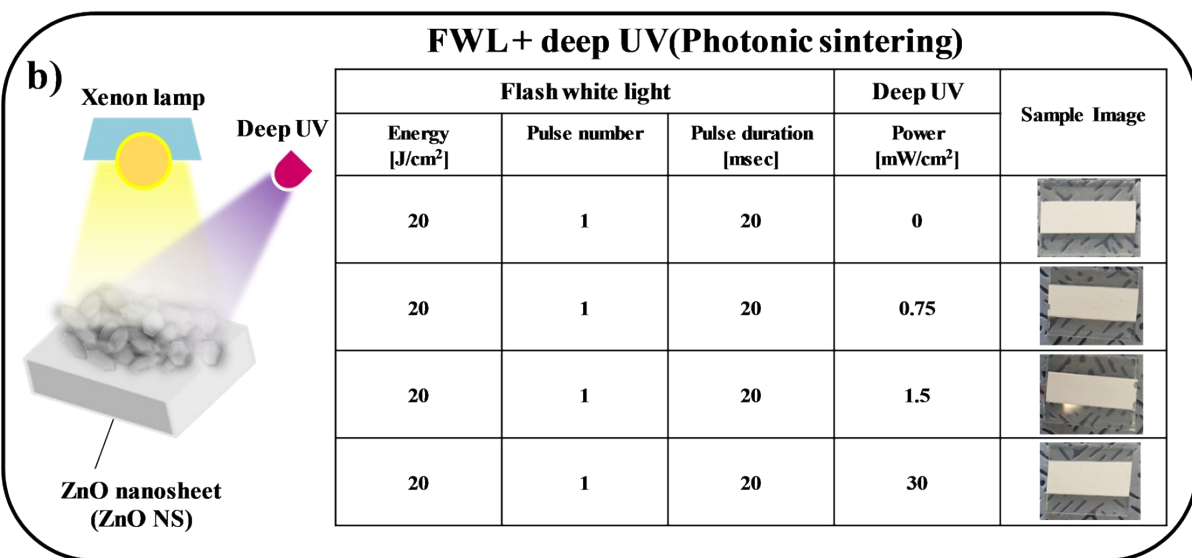

**Figure S1.** (a) Experimental details and photoimages of ZnO NS photoanode sintered using flash white light (FWL) sintering with various pulse energy. (b) ZnO NS sintered using FWL combined deep UV (Photonic sintering).

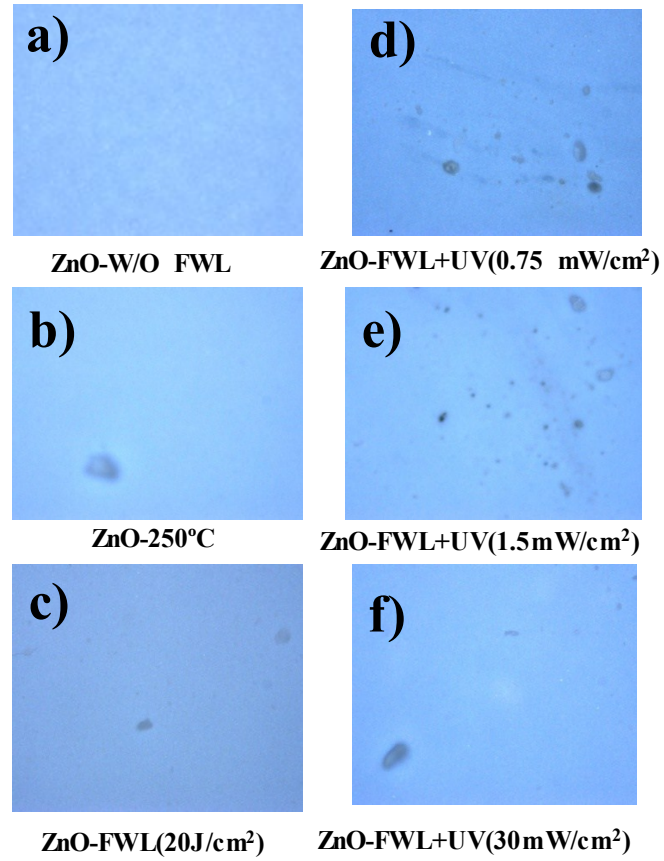

**Figure S2.** Optical microscopy images of ZnO NS (a) pristine, (b) thermal sintering, (c)FWL sintering at 20J/cm<sup>2</sup> energy, d),e),and f) photonic sintered ZnO- A,B and C respectively).

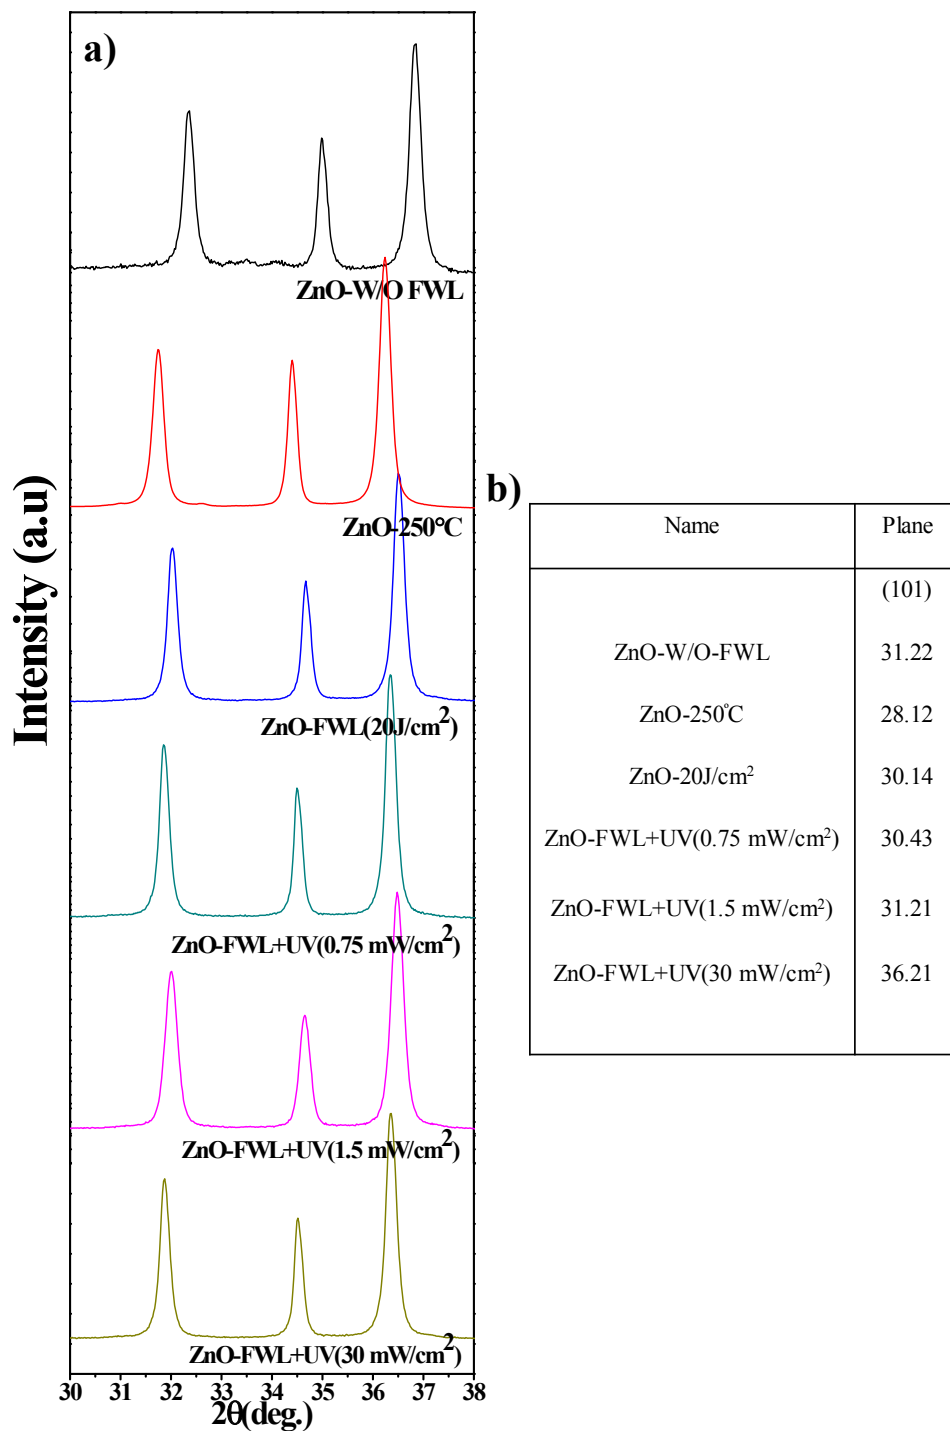

**Figure S3.** (a) The expanded XRD pattern of ZnO NS between 30° to 40° to show the peak shift. (b) Crystal size of ZnO NS calculated using (101) plane.

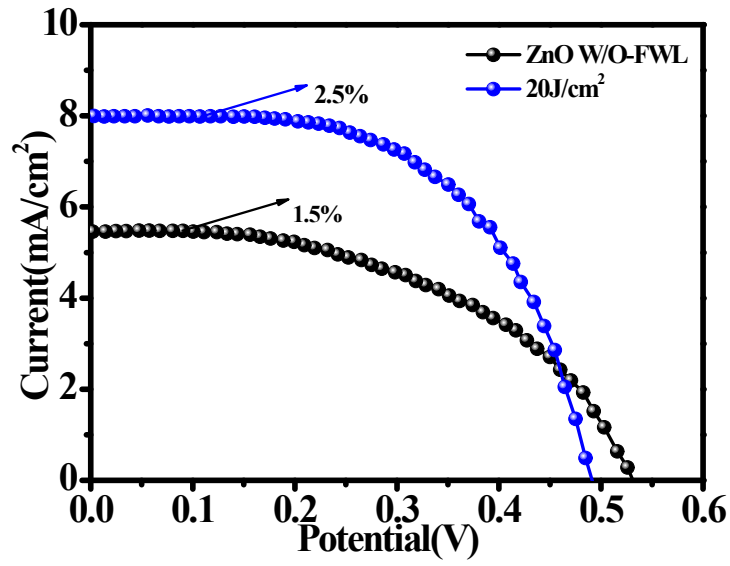

**Figure S4.**  $J$ - $V$  curves of DSSCs consisting of a pristine ZnO NS and with FWL sintered ZnO NS.

**Table S1.** Detailed photovoltaic parameters summarized from the  $J$ - $V$  curves in Figure 2.

| Sample name                    | $V_{oc}$ (V) | $J_{sc}$ (mA/cm <sup>2</sup> ) | $FF$        | PCE ( $\eta$ %) |
|--------------------------------|--------------|--------------------------------|-------------|-----------------|
| ZnO-W/O FWL                    | 0.55         | 5.4                            | 0.50        | 1.5             |
| FWL(15 J/cm <sup>2</sup> )     | 0.53         | 6.9                            | 0.56        | 2.0             |
| <b>FWL(20J/cm<sup>2</sup>)</b> | <b>0.56</b>  | <b>6.7</b>                     | <b>0.65</b> | <b>2.5</b>      |
| FWL(25J/cm <sup>2</sup> )      | 0.53         | 5.1                            | 0.42        | 1.1             |
| FWL(30J/cm <sup>2</sup> )      | 0.56         | 4.6                            | 0.46        | 1.2             |
| FWL(35J/cm <sup>2</sup> )      | 0.52         | 5.3                            | 0.46        | 1.3             |

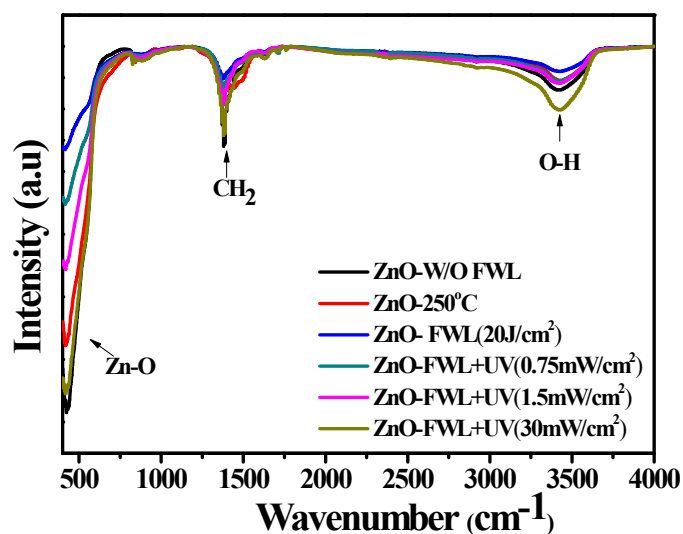

**Figure S5.** FTIR spectra of ZnO NS W/O FWL, thermal sintering and after photonic sintering.

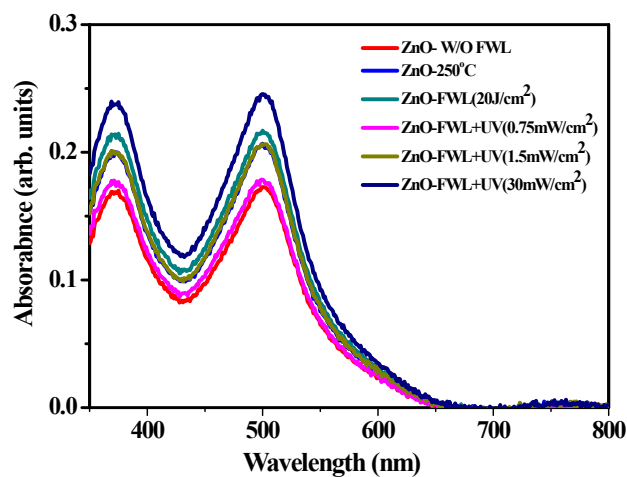

**Figure S6.** UV-vis absorption spectra of N 719-sensitized ZnO NS photoanode with thermal sintering, FWL sintering and without photonic sintering respectively.

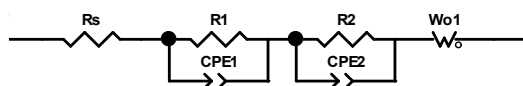

**Figure S7.** An equivalent circuit used for fitting the Nyquist plot.

**Accepted Article**

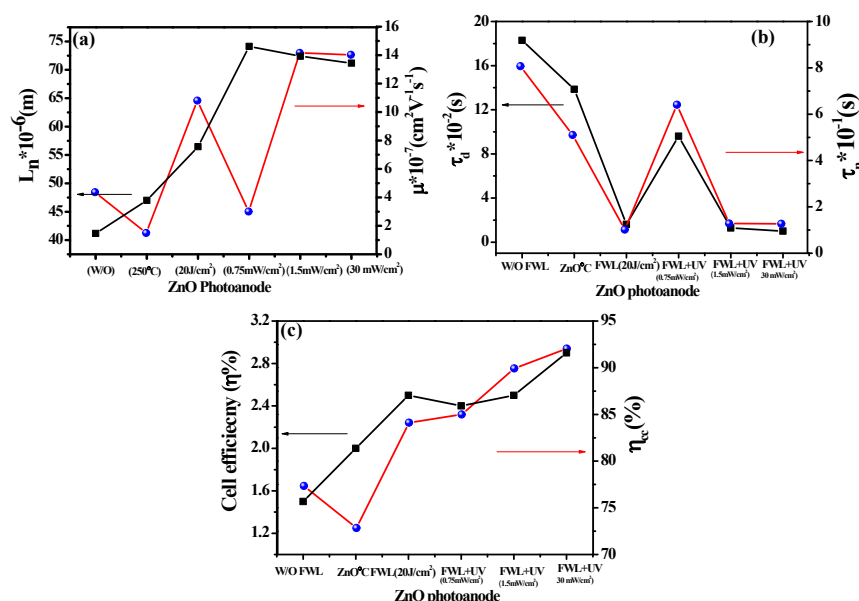

**Figure S8.** Represents diffusion length ( $L_n$ ), and mobility( $\mu$ ) (a), transit time( $\tau_d$ ), and electron life time ( $\tau_n$ ) (b)and charge collection efficiency ( $\eta_{cc}\%$ ) and cell efficiency ( $\eta\%$ ) of ZnO NS photo anode(c) respectively.

**Table S2.** Electrochemical parameters calculated by using EIS for before and after photonic sintering ZnO NS.

| Name                   | Efficiency ( $\eta\%$ ) | $f$ ( $\omega$ ) | $R_i$ ( $R_1$ ) | $R_{ct}$ ( $R_2$ ) | $\tau_n \times 10^{-1}$ (s) | $\tau_d \times 10^{-2}$ (s) | $\eta_{cc}$ (%) | $L_n \times 10^{-6}$ (m) | $D_n \times 10^{-10}$ | $\mu \times 10^{-7}$ ( $\text{cm}^2 \text{V}^{-1} \text{s}^{-1}$ ) |
|------------------------|-------------------------|------------------|-----------------|--------------------|-----------------------------|-----------------------------|-----------------|--------------------------|-----------------------|--------------------------------------------------------------------|
| ZnO-W/O FWL            | 1.5                     | 1.24             | 1.48            | 6.53               | 8.07                        | 18.29                       | 77.34           | 41.17                    | 126                   | 4.91                                                               |
| ZnO-250°C              | 2.0                     | 1.96             | 2.04            | 7.51               | 5.10                        | 13.85                       | 72.84           | 47.01                    | 43                    | 1.68                                                               |
| ZnO-FWL(20J/cm²)       | 2.5                     | 9.85             | 1.05            | 6.61               | 1.02                        | 01.62                       | 84.12           | 56.45                    | 312                   | 12.15                                                              |
| ZnO-FWL+UV(0.75mW/cm²) | 2.4                     | 1.56             | 0.91            | 6.07               | 6.41                        | 09.60                       | 85.00           | 74.12                    | 86                    | 3.38                                                               |
| ZnO-FWL+UV(1.5mW/cm²)  | 2.5                     | 7.83             | 0.55            | 5.45               | 1.28                        | 01.29                       | 89.92           | 72.40                    | 410                   | 15.93                                                              |
| ZnO-FWL+UV(30mW/cm²)   | 2.9                     | 7.84             | 0.51            | 6.44               | 1.27                        | 01.01                       | 92.04           | 71.18                    | 406                   | 15.78                                                              |

The EIS measurement were performed to analyse the electron transport behaviour in the DSSCs, which distinguish the charge transport resistance of device. Using EIS, electron mobility, diffusion length, electron life time, diffusion coefficient was calculated which is shown Table S2.<sup>1-6</sup>

## References

1. J. Bisquert, F. Fabregat-Santiago, I. Mora-Seró, G. Garcia-Belmonte and S. Giménez, *J. Phys. Chem. C*, 2009, **113**, 17278-17290.
2. C.-Y. Lin, Y.-H. Lai, H.-W. Chen, J.-G. Chen, C.-W. Kung, R. Vittal and K.-C. Ho, *Energy Environ. Sci.*, 2011, **4**, 3448 -3455.
3. S. S. Bhande, D. V. Shinde, S. F. Shaikh, S. B. Ambade, R. B. Ambade, R. S. Mane, Inamuddin, M. Naushad and S.-H. Han, *RSC Adv.*, 2014, **4**, 20527–20530.
4. V. Zardetto, F. Di Giacomo, D. Garcia-Alonso, W. Keuning, M. Creatore, C. Mazzuca, A. Reale, A. Di Carlo, T.M. Brown, *Adv. Energy Mater.*, 3 (2013), pp. 1292–1298.
5. Y. Shi, C. Zhu, L. Wang, C. Zhao, W. Li, K. K. Fung, T. Ma, A. Hagfeldt and N. Wang, *Chem. Mater.*, 2013, **25**, 1000-1012.
6. G. Mincuzzi, L. Vesce, M. Liberatore, A. Reale, A. Di Carlo and T. M. Brown, *IEEE Trans. Electron Devices*, 2011, **58**, 3179–3188
